# Supplementary material
Source: PubMed Central journal article supplement (PMC7956056)
Supplement: NIHMS1665269-supplement-7.pdf [file NIHMS1665269-supplement-7.pdf]

## Supplemental Figures

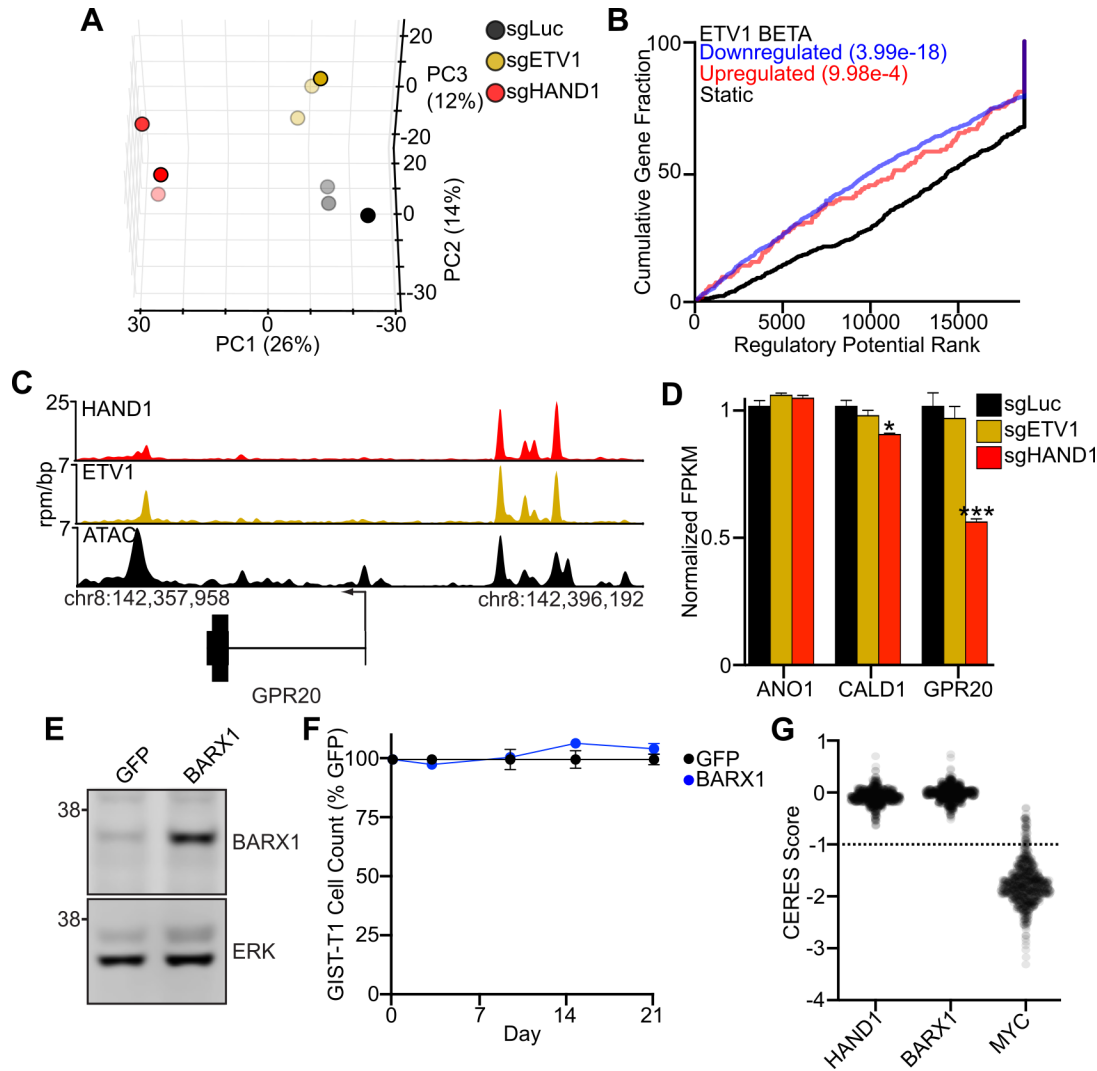

**Figure S1. Effects of GIST TF manipulation *in vitro*.** **A**, PCA of RNA-seq data from GIST-T1 cells treated for 5 days with the indicated sgRNAs ( $n=3$  per group). **B**, BETA integration of ETV1 ChIP-seq and differential gene expression for sgETV1 and sgLuc comparisons. **C**, ChIP-seq tracks for HAND1 and ETV1 and ATAC peaks at the *GPR20* locus. **D**, Expression of GIST biomarkers in cells treated with sgHAND1, sgETV1 or sgLuc as control. Data were analyzed by one-way ANOVA with Dunnett's multiple comparison test ( $n=3$ ; compared to sgLuc; \*,  $P<0.05$ ; \*\*\*,  $P<0.001$ ). **E**, BARX1 overexpression in GIST-T1 demonstrated by BARX1 Western blot, with total ERK levels shown as loading control. **F**, Growth over time assay following stable expression of BARX1 or GFP as control. Cell count is normalized to GFP control ( $n=5$  per construct). **G**, CERES gene dependency scores for HAND1 ( $n=789$ ), BARX1 ( $n=789$ ) or MYC ( $n=777$ ) as comparator across cell lines profiled in the DepMap portal. The horizontal line at -1 indicates the threshold for considering a gene essential in a given cell line. No GIST cell lines have yet been included in the DepMap portal.

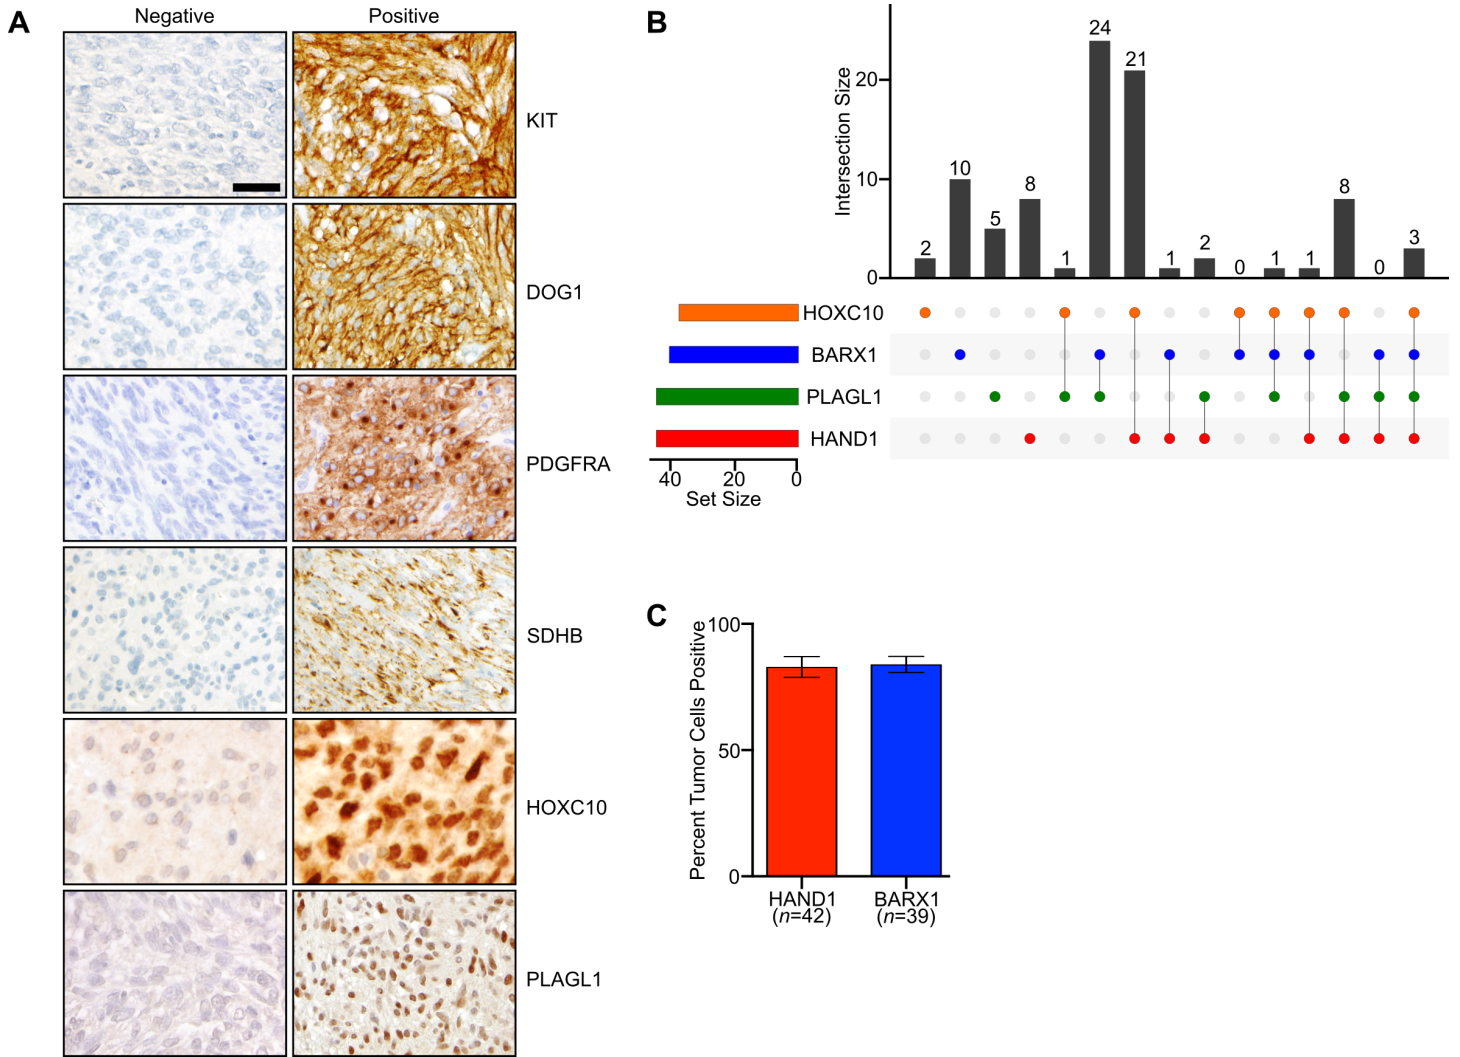

**Figure S2. Expression patterns of GIST biomarkers and TFs. A**, KIT, DOG1, PDGFRA, SDHB, HOXC10 and PLAGL1 IHC, with examples of negative and positive samples shown. DOG1 and KIT exhibit a membranous expression pattern, PDGFRA a peri-nuclear Golgi or dot-like expression pattern in PDGFRA-mutant GIST, and nuclear localization of TFs (scale bar, 20  $\mu$ m). **B**, Upset plot showing co-expression relationships of HAND1, HOXC10, BARX1 and PLAGL1. **C**, Percentage of tumor cells positive by IHC for HAND1 ( $n=42$ ) or BARX1 ( $n=39$ ) by blinded expert pathology review in tumors expressing either marker.

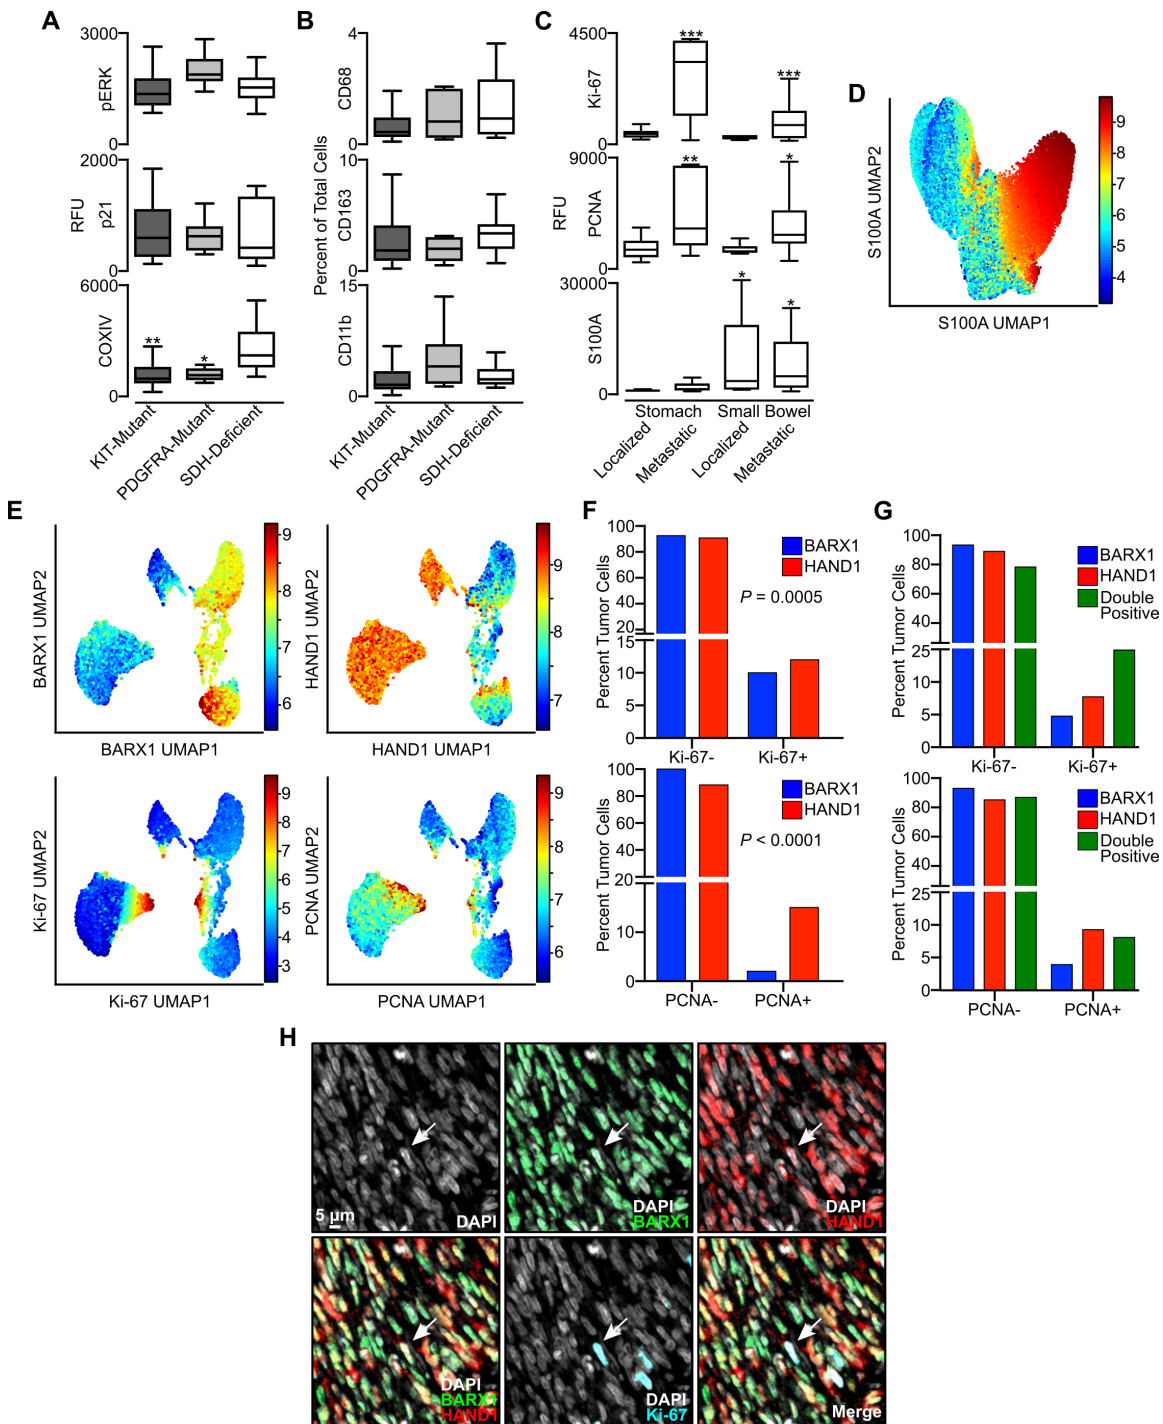

**Figure S3. Tissue level and single cell analysis of multiplexed CyCIF imaging.** **A**, Relative intensity of signal in whole tissue of phospho-ERK, p21 and COXIV in KIT-mutant ( $n=65$ ), PDGFRA-mutant ( $n=10$ ), and SDH-deficient ( $n=12$ ) GIST. Data were analyzed by one-way ANOVA with Tukey's multiple comparison test (compared to SDH-deficient GIST; \*,  $P<0.05$ ; \*\*,  $P<0.0015$ ). **B**, Percent of total cells in whole tissues expressing CD68, CD163 and CD11b in KIT-mutant ( $n=65$ ), PDGFRA-mutant ( $n=10$ ), and SDH-deficient ( $n=12$ ) GIST. **C**, Relative signal of Ki-67, PCNA and S100A in KIT-mutant GIST stratified by anatomic origin and localized versus metastatic state. Data were analyzed by one-way ANOVA with Tukey's multiple comparison test (compared to localized gastric GIST; \*,  $P<0.05$ ; \*\*,  $P<0.001$ ; \*\*\*,  $P<0.0001$ ). **D**, UMAP of all tumor samples for single tumor cells (87 tumors,  $n=156,036$  cells), defined by the expression of HAND1 and/or BARX1, with heatmap showing S100A signal. **E**, UMAP with single cell analysis of tumors expressing both HAND1 and BARX1 by IHC (5 tumors,  $n=11,658$  cells) with heatmaps showing HAND1, BARX1, Ki-67, and PCNA log<sub>2</sub> RFU. **F**, Percent of tumor cells from IHC double-positive samples that were negative or positive for Ki-67 (upper panel) or PCNA (lower panel) stratified by BARX1 (blue,  $n=4,871$ ) or HAND1 (red,  $n=6,350$ ) expression.

Data were analyzed by Fisher's exact test with *P* value indicated. **G**, Percent of all tumor cells that were negative or positive for Ki-67 (upper panel) or PCNA (lower panel) stratified by BARX1 expression (blue,  $n=65,340$ ), HAND1 expression (red,  $n=81,501$ ), or double positive cells expressing both BARX1 and HAND1 (green,  $n=9,195$ ). **H**, Image showing signal for DAPI (white), BARX1 (green), HAND1 (red) and Ki-67 (blue) in a tumor positive for both HAND1 and BARX1 by IHC (scale bar, 5  $\mu\text{m}$ ).

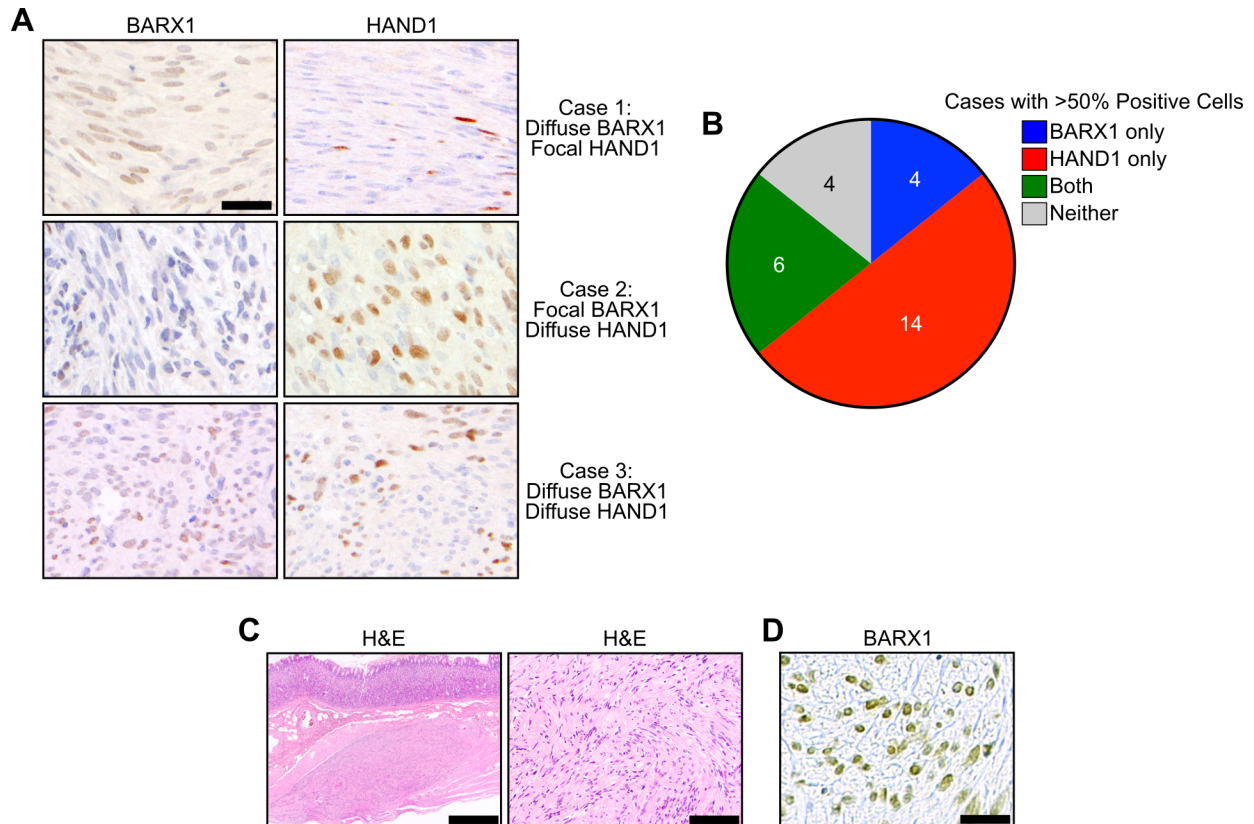

**Figure S4. GIST samples with heterogeneous BARX1 and HAND1 expression and BARX1 expression in micro-GIST.** **A**, Individual cases with diffuse BARX1 and focal HAND1 (top panels, scale bar indicates 20  $\mu\text{m}$ ), focal BARX1 and diffuse HAND1 (middle panels), and diffuse BARX1 and diffuse HAND1 (lower panels). **B**, Pie chart showing the distribution double positive cases categorized by one, both or neither TF being expressed in >50% of tumor cells. **C**, H&E of micro-GIST (left panel scale bar 500  $\mu\text{m}$ ; right panel 50  $\mu\text{m}$ ). **D**, BARX1 IHC of micro-GIST (scale bar, 20  $\mu\text{m}$ ).

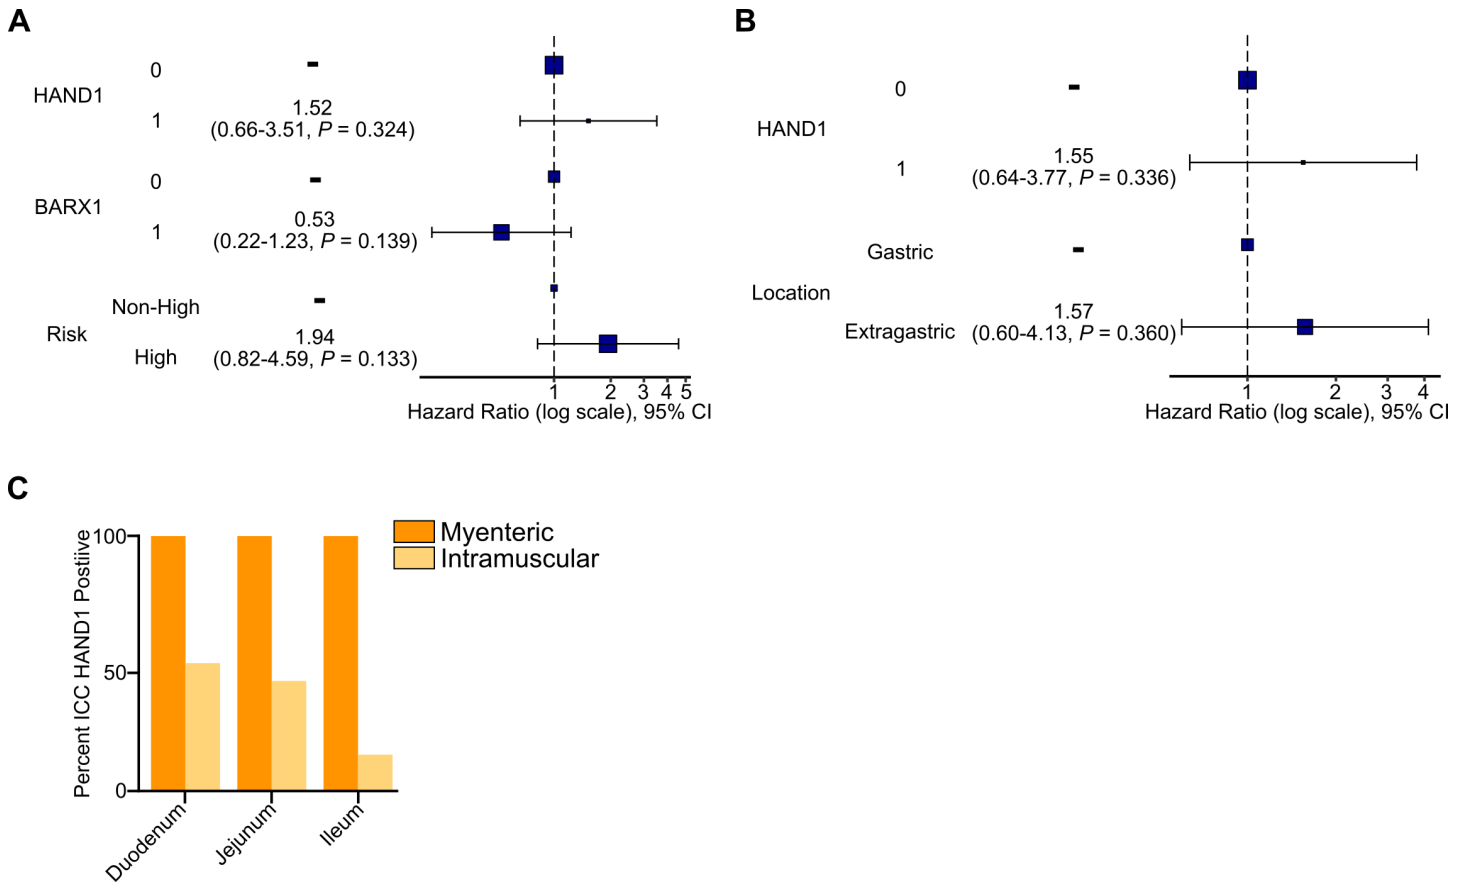

**Figure S5. GIST Multivariate Analysis and HAND1 in ICCs of the small intestine. A,** Hazard-ratio plot with corresponding 95% confidence intervals for a multivariable Cox proportional hazards model for relapse-free survival as a function of HAND1 status (ref: HAND1-), BARX1 status (ref: BARX1-) and Risk status (ref: Non-High Risk). **B,** Hazard-ratio plot with corresponding 95% confidence intervals for a multivariable Cox proportional hazards model for relapse-free survival as a function of HAND1 status (ref: HAND1-) and tumor location (ref: gastric). **C,** Within the small intestine, percentage of whole slides with ICC that were positive for HAND1 at myenteric or intramuscular sites in the duodenum ( $n=14$ ), jejunum ( $n=7$ ) or ileum ( $n=7$ ).

**Table S1. GIST RNA-seq Cohort**

**Table S2. CyCIF Antibodies**

**Table S3. CyCIF Proliferation Percentages.** Individual cells expressing HAND1, BARX1 or positive for both TFs in all samples ( $n=87$ ), localized gastric tumors ( $n=15$ ) and GIST tumors double-positive by IHC for both TFs ( $n=5$ ) stratified by Ki-67 and PCNA expression.

**Table S4. GIST Immunohistochemistry Cohort.** Summary of all samples ( $n=437$ ) with available information including gender, age at diagnosis, primary tumor site, GIST oncogene subtype and mutated exon. The cohort is stratified by HAND1 and BARX1 expression, with summary statistics shown.

**Table S5: Cases of BARX1-/HAND1- GIST**

**Table S6: Cases of BARX1+/HAND1- Extragastric GIST**
